# Supplementary material
Source: PubMed Central journal article supplement (PMC1369093)
Supplement: 6-7400428-s1.pdf [file 6-7400428-s1.pdf]

| Gene and position  | Strains name (Plr+/Plr-) | Distance from dif (kb) | Position (kb) (minute) | Gene function                                 | Filamentation |      | Viability index |      |
|--------------------|--------------------------|------------------------|------------------------|-----------------------------------------------|---------------|------|-----------------|------|
|                    |                          |                        |                        |                                               | Plr+          | Plr- | Plr+            | Plr- |
| <i>zch237 ycgU</i> | XL215<br>XL245           | -336,2                 | 1252<br>27             | FU                                            | +             | +++  | 96              | 73   |
| <i>pyrF</i>        | XL210<br>XL240           | -248,8                 | 1339,9<br>28,88        | Orotidine-5'-phosphate decarboxylase          | +             | ++   | 97,5            | 81,8 |
| <i>zda192 stfR</i> | XL236<br>XL376           | -150,9                 | 1438,8<br>31,01        | Phage lambda stf gene homolog in prophage Rac | +             | ++   | 92,5            | 84,9 |
| <i>MR6 ydbD</i>    | XL157<br>XL167           | -113,5                 | 1473,2<br>31,75        | FU                                            | +             | ++   | 92,5            | 77,7 |
| <i>zdc310 sfcA</i> | XL237<br>XL377           | -35,3                  | 1553,5<br>34,23        | Putative malic enzyme, NAD linked             | +             | ++   | 97,9            | 81   |
| <i>zdd346 yneL</i> |                          | -0,696                 | 1588<br>34,23          | FU                                            |               |      |                 |      |
| <i>dif</i>         |                          | 0                      | 1588,8<br>34,25        | Chromosome dimer resolution site              |               |      |                 |      |
| <i>zdd347 hipA</i> |                          | 0,994                  | 1589,7<br>34,27        | probable role in cell division (hipAB operon) |               |      |                 |      |
| <i>Sp17 ydeK</i>   | XL162<br>XL152           | 7,3                    | 1596,1<br>34,32        | FU                                            | -             | +    | 100             | 88,5 |
| <i>zdd370 yneI</i> | XL379<br>XL239           | 25                     | 1612<br>34,74          | FU                                            | +             | ++   | 97,4            | 77,8 |
| <i>MR4 ydfE</i>    | XL166<br>XL156           | 59,5                   | 1648<br>35,53          | FU                                            | +             | ++   | 94,7            | 81,1 |
| <i>Zdh201 ydh)</i> | XL381<br>XL391           | 127,6                  | 1716,4<br>37           | FU                                            | +             | ++   | 96,8            | 87,3 |
| <i>Zeq225 yeal</i> | XL385<br>XL395           | 280,2                  | 1869<br>40,28          | FU                                            | ND            | ND   | 97              | 77,8 |
| <i>HisG</i>        | XL244<br>XL214           | 499,4                  | 2088,2<br>45,01        | ATP phosphoribosyl transferase                | ++            | +++  | 91,9            | 76   |

Table 1: Intra-Ter inversions. Inversions were selected between the *dif* position (*zdd346::lacZ::attB* or *zdd347::lacZ attB*) and the indicated *attP* insertion. Given are: the position of *attP* insertion together with the gene concerned, the name of the strains carrying inversion (Plr+ and Plr-), the distance of *attP* from *dif* (negative values for replicore I and positive for replicore II), the position of *attP* on the chromosome map in kb and minutes, the function of the gene disrupted by the *attP* insertion (FU: function unknown; data from the colibri web site: <http://genolist.pasteur.fr/Colibri/>). The percentage of filamentous cells in exponentially growing cultures was estimated by FACS as described in Bigot et al., 2004: +++: 20 to 30% filament (as for a *dif*-deleted strain); ++: 10 to 20% filament; +: 1 to 10% filament; -: no filament; ND: not done. The viability index was measured using the co-culture assay (Methods, same values as in Figure 2).

| Gene and position                   | Strains name<br>Plr+/Plr- | Distance from dif (kb) | Position (kb) (minute) | Gene function                                       | Temperature sensitivity |      | Generation time |      |
|-------------------------------------|---------------------------|------------------------|------------------------|-----------------------------------------------------|-------------------------|------|-----------------|------|
|                                     |                           |                        |                        |                                                     | Plr+                    | Plr- | Plr+            | Plr- |
| <i>metE</i>                         | XL246<br>XL216            | -2217,4                | 4010,6<br>86,45        | Tetrahydropteroyltrimethyltransferase               | +++                     | +++  | 94              | 180  |
| <i>purA::</i>                       | XL211<br>XL241            | -1825,5                | 4402,3<br>94,89        | Adenylosuccinate synthetase                         | +++                     | +++  | 112             | 220  |
| <i>sp5</i><br>( <i>yafT-yafF</i> )  | XL161<br>XL151            | -1565                  | 237,3<br>5,12          | FU                                                  | +++                     | +++  | 92              | 110  |
| <i>sp39</i><br>( <i>ybgS-aroG</i> ) | XL154<br>XL165            | -800                   | 784,76<br>16,92        | aroG DAHP synthetase<br>ybgS Function unknown       | +                       | ++   | 75              | 87   |
| <i>aroA</i>                         | XL219<br>XL249            | -630,8                 | 958<br>20,65           | 3-Enolpyruvylshikimate-5-phosphate synthetase       | +                       | ++   | 70              | 76,8 |
| <i>napA722</i>                      | XL383<br>XL393            | 707,2                  | 2300,8<br>49,54        | Nitrate reductase homologue                         | +                       | ++   |                 | ND   |
| <i>pheA</i>                         | XL244<br>XL214            | 1147                   | 2735,8<br>58,97        | Chorismate mutase-P-prephenate dehydratase          | +                       | +++  | 73              | 180  |
| <i>sp34</i><br><i>ygcY</i>          | XL163<br>XL153            | 1330                   | 2918,8<br>62,89        | FU                                                  | ++                      | ++   |                 | ND   |
| <i>sp122</i><br><i>gspF</i>         | XL165<br>XL155            | 1868,7                 | 3457,5<br>74,53        | General secretory pathway genes of unknown function | ++                      | ++   | 86              | 180  |
| <i>malA</i>                         | XL248<br>XL218            | 1962                   | 3550,1<br>76,47        | Maltodextrine phosphatase                           | ++                      | ++   | 97              | 196  |

Table 2: Inter-domain inversions. Inversions were selected between the *dif* position (*zdd346::lacZ::attB* or *zdd347::lacZ attB* and the indicated *attP* insertion. Given are: the position of *attP* insertion with the gene concerned, the name of the strains carrying inversion (Plr+ and Plr-), the distance of *attP* from *dif* (negative values for replicore I and positive for replicore II), the position of *attP* on the chromosome map in kb and minutes, the function of the gene disrupted by the *attP* insertion (FU: function unknown; data from the colibri web site: <http://genolist.pasteur.fr/Colibri/>). The level of sensitivity to high temperature is shown (estimated from the ratio of plating efficiency at 42 and 30°C in 10µl spots, Methods and Figure 4): +: ability to form colonies not affected but growth rate on plate reduced (colonies are smaller at 42°C than at 30°C for the same incubation time); ++: plating efficiency 10 to 1000 time reduced; +++: plating efficiency more than 1000 time reduced (only few big colonies corresponding to reverted clones are growing). Generation times in permissive conditions (synthetic medium at 30°C) were calculated from growth curves (ND: not done; Methods).
